# Supplementary material for: Extraction of plant growth regulators present in Kappaphycus alvarezii sap using imidazolium based ionic liquids: detection and quantification by using HPLC-DAD technique
Source: Royal Society of Chemistry journal article supplement (doi:10.1039/c5ay02210j), 2015-01-01
Supplement: c5ay02210j1.pdf [file c5ay02210j1.pdf]

## Electronic Supporting information

### Extraction of plant growth regulators present in *Kappaphycus alvarezii* sap by imidazolium based ionic liquids: Detection and quantification by HPLC–DAD technique

Arun Kumar Das <sup>[a]</sup> & Kamalesh Prasad\* <sup>[b,c]</sup>

<sup>a</sup>Analytical Division & Centralized Instrument Facility, CSIR-Central Salt & Marine Chemicals Research Institute, G. B Marg, Bhavnagar-364002 (Gujarat), India.

<sup>b</sup>Marine Biotechnology and Ecology Division, CSIR-Central Salt & Marine Chemicals Research Institute, G. B Marg, Bhavnagar-364002 (Gujarat), India.

<sup>c</sup>AcSIR- Central Salt & Marine Chemicals Research Institute, G. B Marg, Bhavnagar-364002 (Gujarat), India.

#### Extraction of sap from fresh *Kappaphycus alvarezii*

**Extraction of *Kappaphycus* sap:** 500 g of fresh *Kappaphycus alvarezii* seaweed was mechanically squeezed using kitchen mixture grinder followed by filtration to yield *Kappaphycus* sap with 75% (w/w) yield.

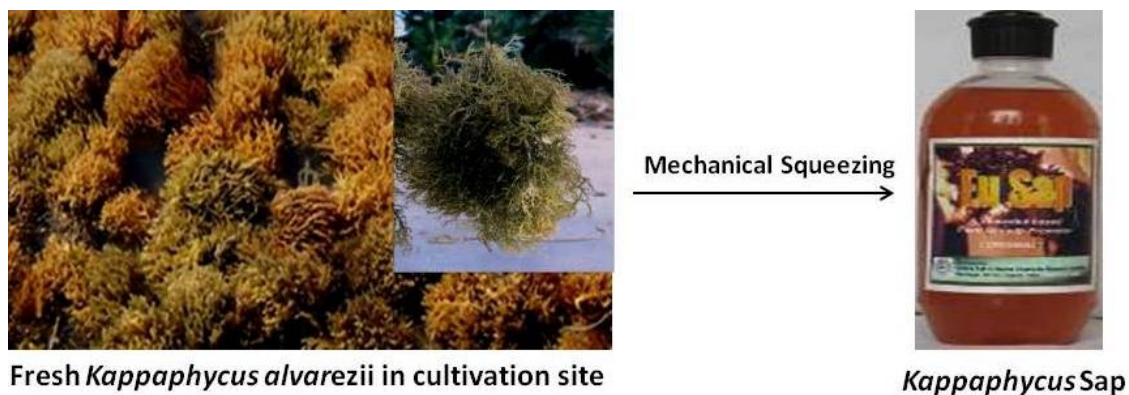

**Figure S1.** Extraction of *Kappaphycus* sap from fresh *Kappaphycus alvarezii* seaweed

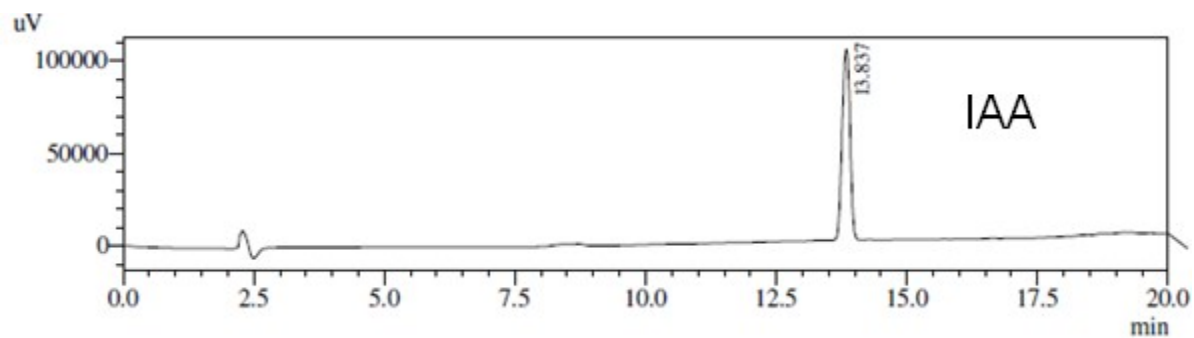

**Figure S2.** HPLC Chromatogram of standard IAA

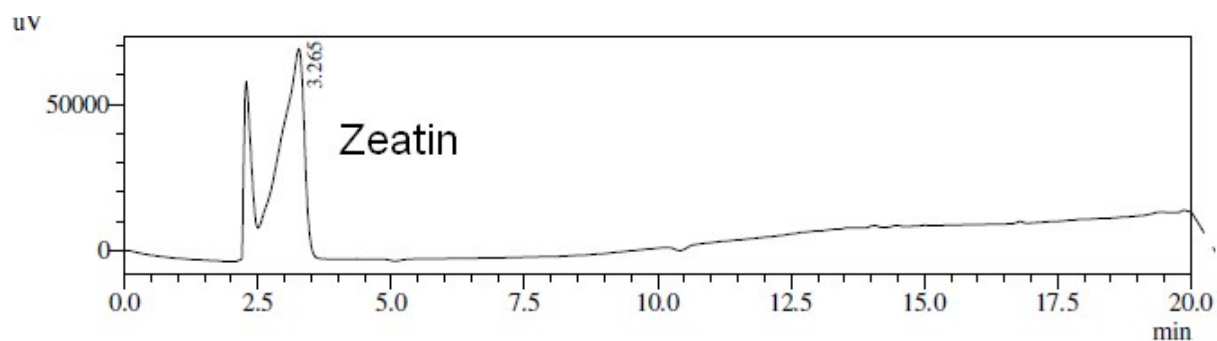

**Figure S3.** HPLC Chromatogram of standard trans-zeatin

**Table S1:** Details of calibration plot of IAA and Zeatin

| Standard compound | Calibration equation | Regression coefficient | Linearity range         | RSD% |
|-------------------|----------------------|------------------------|-------------------------|------|
| IAA               | $Y=35502X+10096$     | 0.985                  | 3-25 mg.L <sup>-1</sup> | 0.2  |
| Zeatin            | $Y=60237X+47922$     | 0.974                  | 3-25 mg.L <sup>-1</sup> | 1.24 |

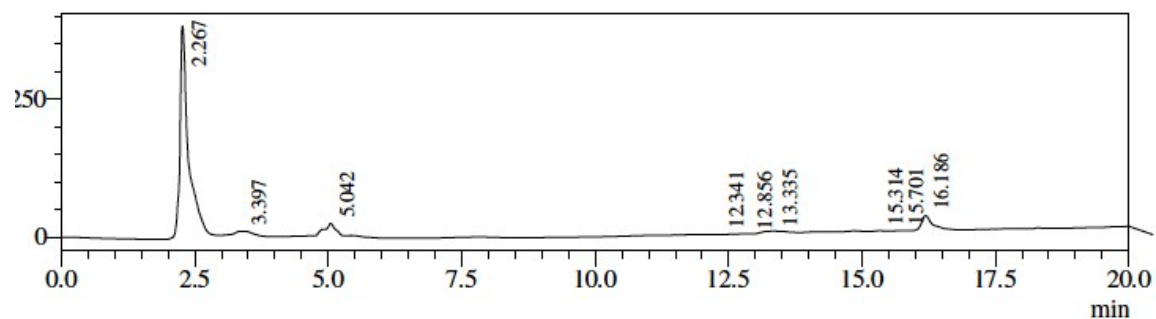

**Figure S4** : HPLC chromatogram of diluted [Bmim][PF<sub>6</sub>] phase extracted at 40 °C

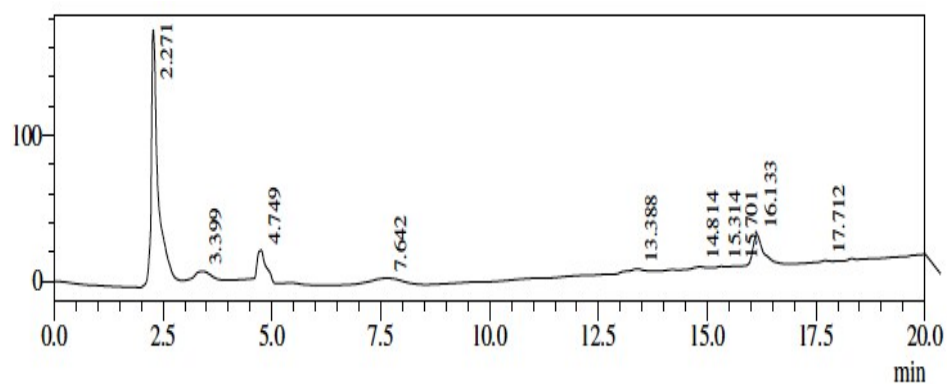

**Figure S5** : HPLC chromatogram of diluted [Bmim][PF<sub>6</sub>] phase extracted at 50 °C

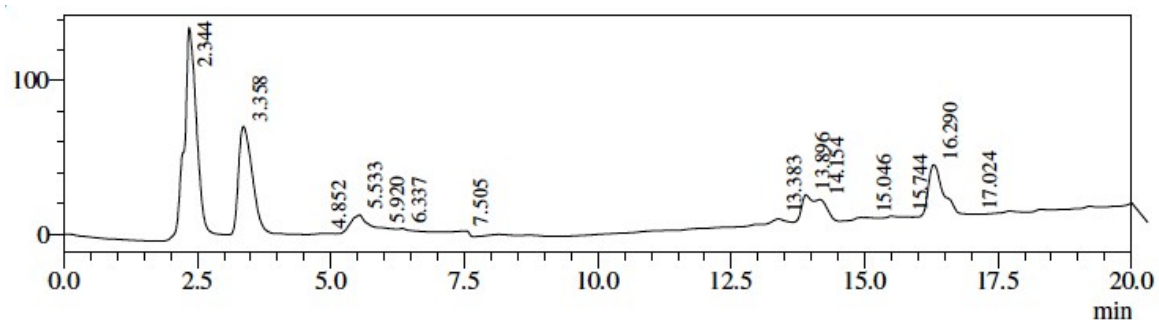

**Figure S6** : HPLC chromatogram of diluted [Bmim][PF<sub>6</sub>] phase extracted at 40 °C after spiking with IAA and *trans*-zeatin
